# Supplementary material for: Pathological characterization of a novel mouse model expressing the PD-linked CHCHD2-T61I mutation
Source: PubMed Central journal article supplement — Hum Mol Genet. 2022 Jul 4;31(23):3987–4005. doi: 10.1093/hmg/ddac083 (PMC9703812; doi:10.1093/hmg/ddac083), 2022-07-04

# Supplementary Figure 1.

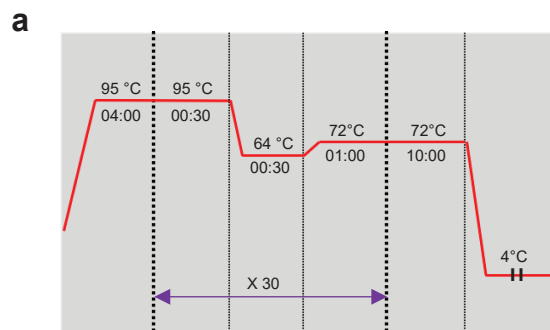

F: 5' ATG AGA GCT GCA CCC AGG CCA 3'  
 R: 5' CTG CTG CTG CTG TGC TGG CT 3'

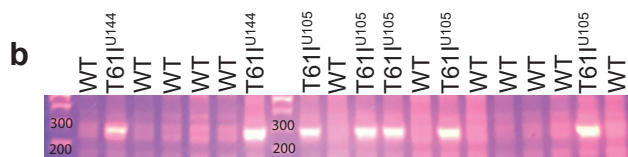

**c**

|                     |      |           |     |                |
|---------------------|------|-----------|-----|----------------|
| hCHCHD2             | GGCC | CAGATGGCA | ACC | CACTGCAGCTGGCG |
| T61 <sup>U144</sup> | GGCC | CAGATGGCA | AT  | CACTGCAGCTGGCG |
| hCHCHD2             | GGCC | CAGATGGCA | ACC | CACTGCAGCTGGCG |
| T61 <sup>U105</sup> | GGCC | CAGATGGCA | AT  | CACTGCAGCTGGCG |

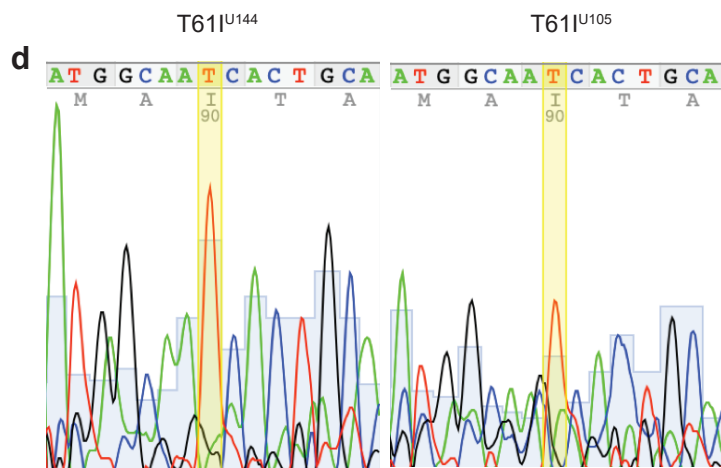

Supplement: supplementary_figure_1_ddac083.pdf [file supplementary_figure_1_ddac083.pdf]
