# Supplementary material for: Pathological characterization of a novel mouse model expressing the PD-linked CHCHD2-T61I mutation
Source: PubMed Central journal article supplement — Hum Mol Genet. 2022 Jul 4;31(23):3987–4005. doi: 10.1093/hmg/ddac083 (PMC9703812; doi:10.1093/hmg/ddac083), 2022-07-04

**a Canonical pathways with decreased insoluble proteins in CHCHD2-T61I vs. WT**

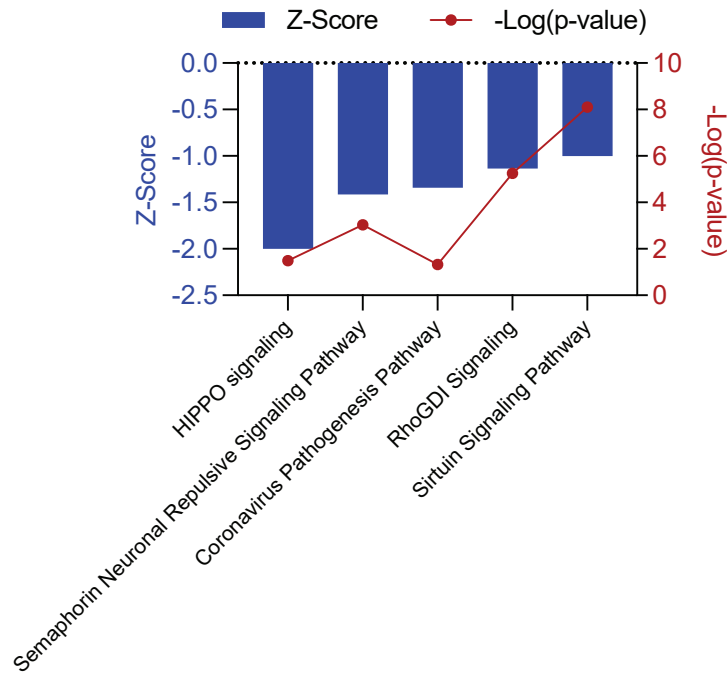

**b Top canonical pathways altered in CHCHD1-T61I (no Z-score) (Soluble proteins: CHCHD2-T61I vs. WT)**

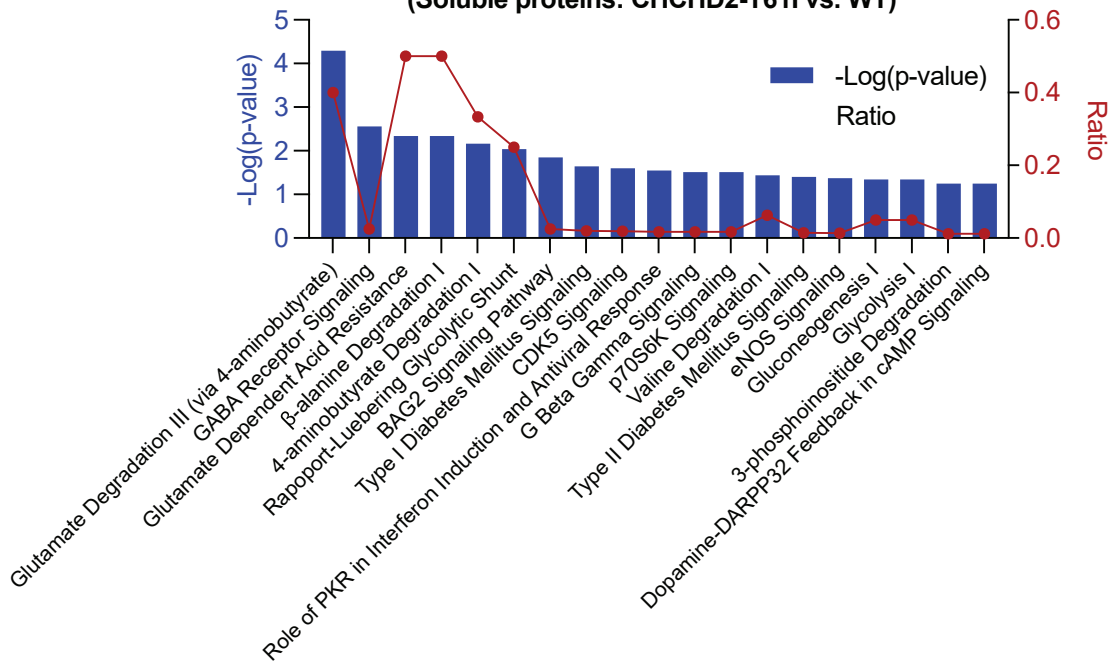

Supplement: supplementary_figure_7_ddac083.pdf [file supplementary_figure_7_ddac083.pdf]
