# Supplementary figures and images for: Pathological characterization of a novel mouse model expressing the PD-linked CHCHD2-T61I mutation
Source: PubMed Central journal article supplement — Hum Mol Genet. 2022 Jul 4;31(23):3987–4005. doi: 10.1093/hmg/ddac083 (PMC9703812; doi:10.1093/hmg/ddac083), 2022-07-04

## Supplementary Figure 2.

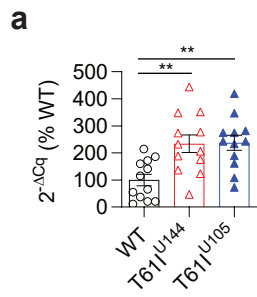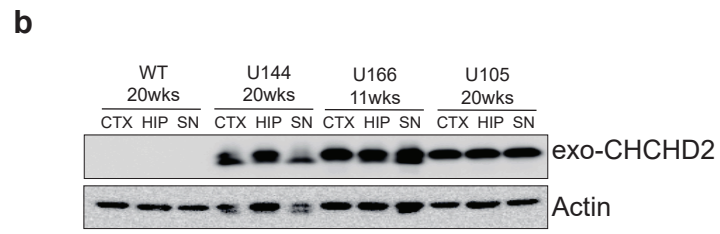

Supplement: supplementary_figure_2_ddac083.pdf [file supplementary_figure_2_ddac083.pdf]

### Supplementary Figure 3.

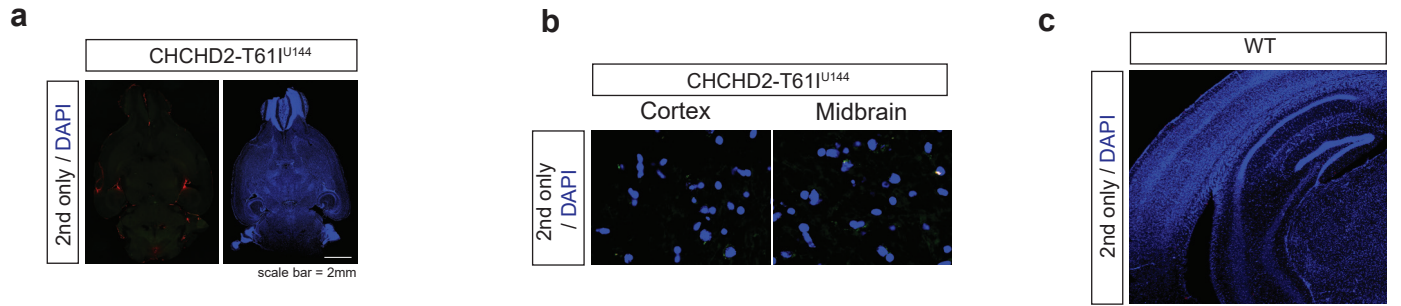

Supplement: supplementary_figure_3_ddac083.pdf [file supplementary_figure_3_ddac083.pdf]

# Supplementary Figure 4.

**a**

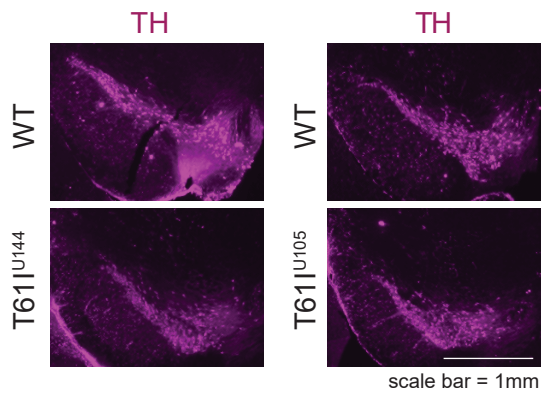

**b**

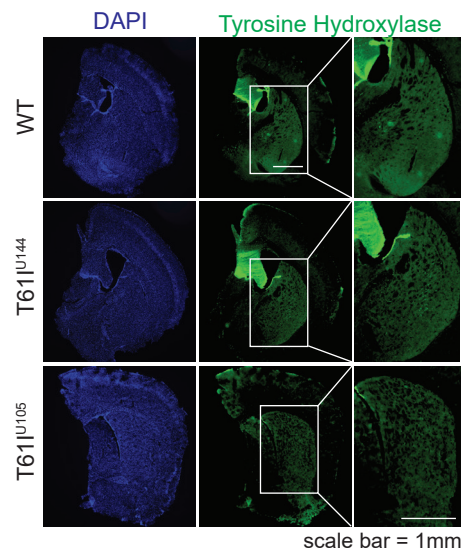

**c**

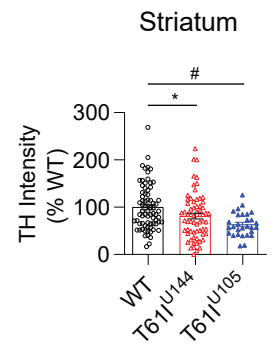

Supplement: supplementary_figure_4_ddac083.pdf [file supplementary_figure_4_ddac083.pdf]

# Supplementary Figure 5.

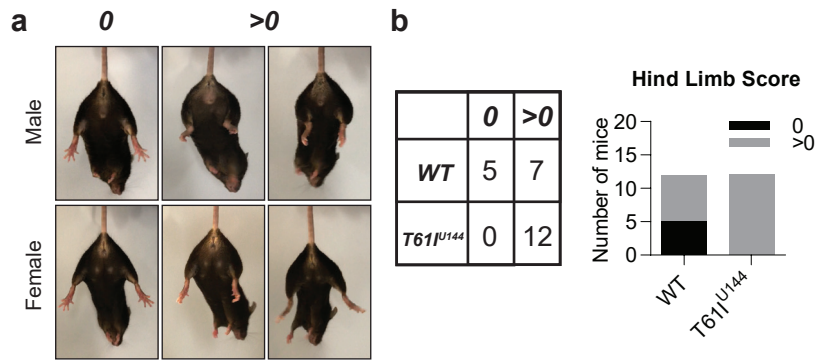

Supplement: supplementary_figure_5_ddac083.pdf [file supplementary_figure_5_ddac083.pdf]

## Supplementary Figure 6.

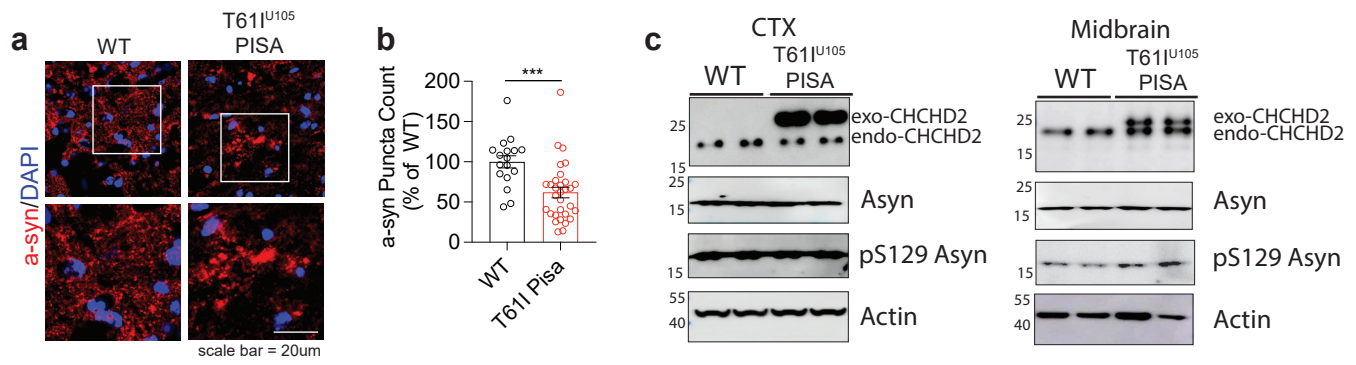

Supplement: supplementary_figure_6_ddac083.pdf [file supplementary_figure_6_ddac083.pdf]
